# Supplementary material
Source: PubMed Central journal article supplement (PMC2592653)

## **E08-04-0430 McCulloch**

### **SUPPLEMENTARY FIGURE LEGENDS**

**S1.a-** Quantification of representative blots of pull down assay with GST-RalGDS to determine levels of GTP-bound Rap1 associated with collagen and vitronectin coated beads. **b-** Quantification of experiments with  $\alpha 2\beta 1$  blocking antibody or with control antibody to show importance of  $\alpha 2\beta 1$  integrin in Rap1 activation.

**S2.** Left panel: Immunoblot of Rap1 expression levels in fibroblasts treated with Rap1 siRNA (a), control siRNA (b), untreated cells (c) and cells treated with transfection reagent alone (d). Rap1-specific siRNA reduced Rap1 protein levels by 70% compared to cells treated with control siRNA in this representative experiment. Right panel: In three experiments, Rap1 was reduced by 65-75%;  $p < 0.05$ .

**S3.** a-Rap1, Rap2 or  $\beta 1$  integrin immunoprecipitates of bead-associated proteins. Quantification (mean  $\pm$  sem) is shown for 3 experiments. Collagen treated (T) and untreated (UT) samples. **b-** Treatment with ML-7 (25  $\mu$ M) inhibited collagen-induced phosphorylation of MLC. **c-** Cells transfected with MLCK siRNA show 70-80% reduction in MLCK levels as evaluated by densitometry. **d-** Lysates prepared from fibroblasts treated with ionomycin exhibit time-dependent phosphorylation of MLC.

**S4-** GST-RalGDS fusion protein was used to determine levels of GTP-bound Rap1 in wild-type, NM II-A and NM II-B null ES cells after incubation with collagen-coated beads. Data represent the mean  $\pm$  sem for the ratio of active Rap1 to total Rap1 (3 independent experiments).

**S5-** a- Fibroblasts treated with blebbistatin (40 $\mu$ M) show recruitment of actin around beads independent of myosin activity. **b-** Quantitation of rhodamine phalloidin fluorescence intensity around beads.

a

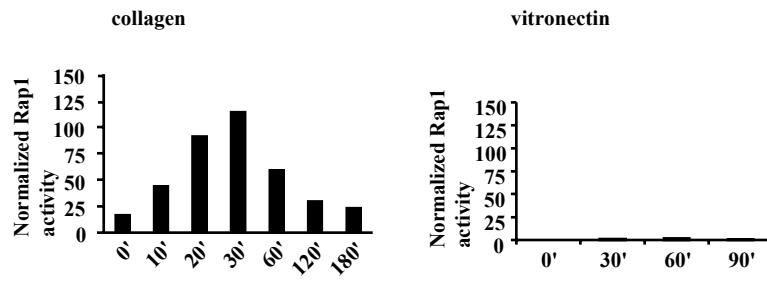

b

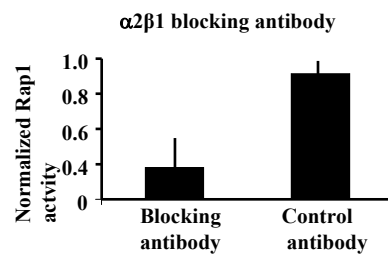

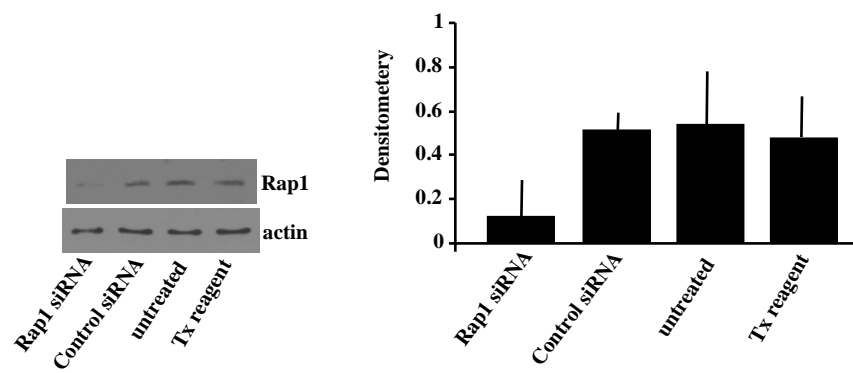

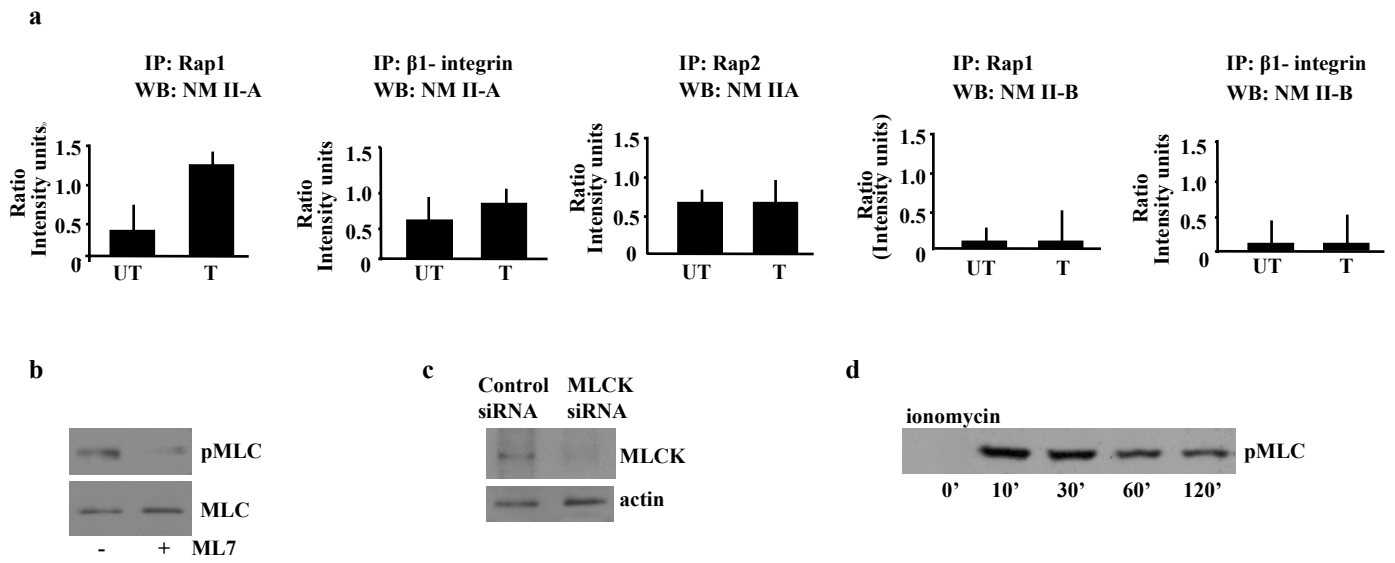

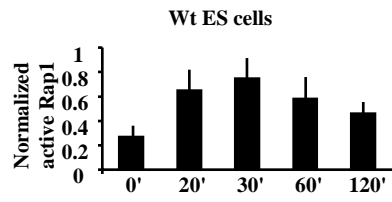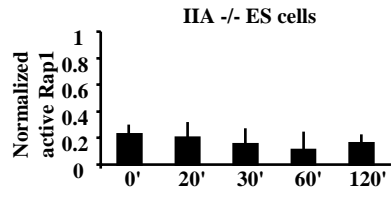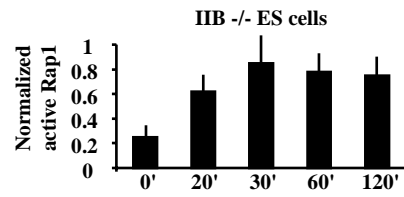

**a**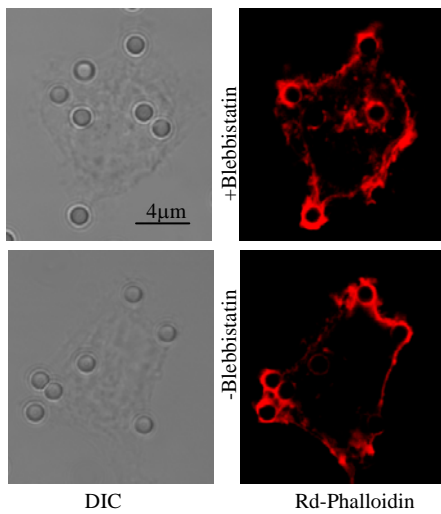**b**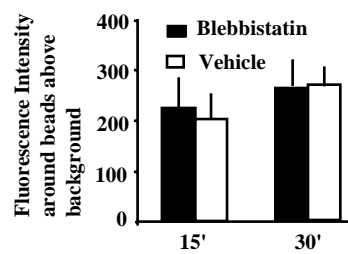

Supplement: E08-04-0430_1.pdf [file E08-04-0430_1.pdf]
